# Supplementary material for: Does a Supplemental Low-Protein Diet Decrease Mortality and Adverse Events After Commencing Dialysis? A Nationwide Cohort Study
Source: Nutrients. 2018 Aug 8;10(8):1035. doi: 10.3390/nu10081035 (PMC6115816; doi:10.3390/nu10081035)
Supplement: Supplementary file 1 [file nutrients-10-01035-s001.pdf]

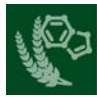

# Supplementary Materials: Does a Supplemental Low-Protein Diet Decrease Mortality and Adverse Events After Commencing Dialysis? A Nationwide Cohort Study

Chieh-Li Yen <sup>1,†</sup>, Kun-Hua Tu <sup>1,†</sup>, Ming-Shyan Lin <sup>2</sup>, Su-Wei Chang <sup>3,4</sup>, Pei-Chun Fan <sup>1</sup>, Ching-Chung Hsiao <sup>1</sup>, Chao-Yu Chen <sup>1</sup>, Hsiang-Hao Hsu <sup>1</sup>, Ya-Chun Tian <sup>1</sup>, Chih-Hsiang Chang <sup>1,\*</sup>

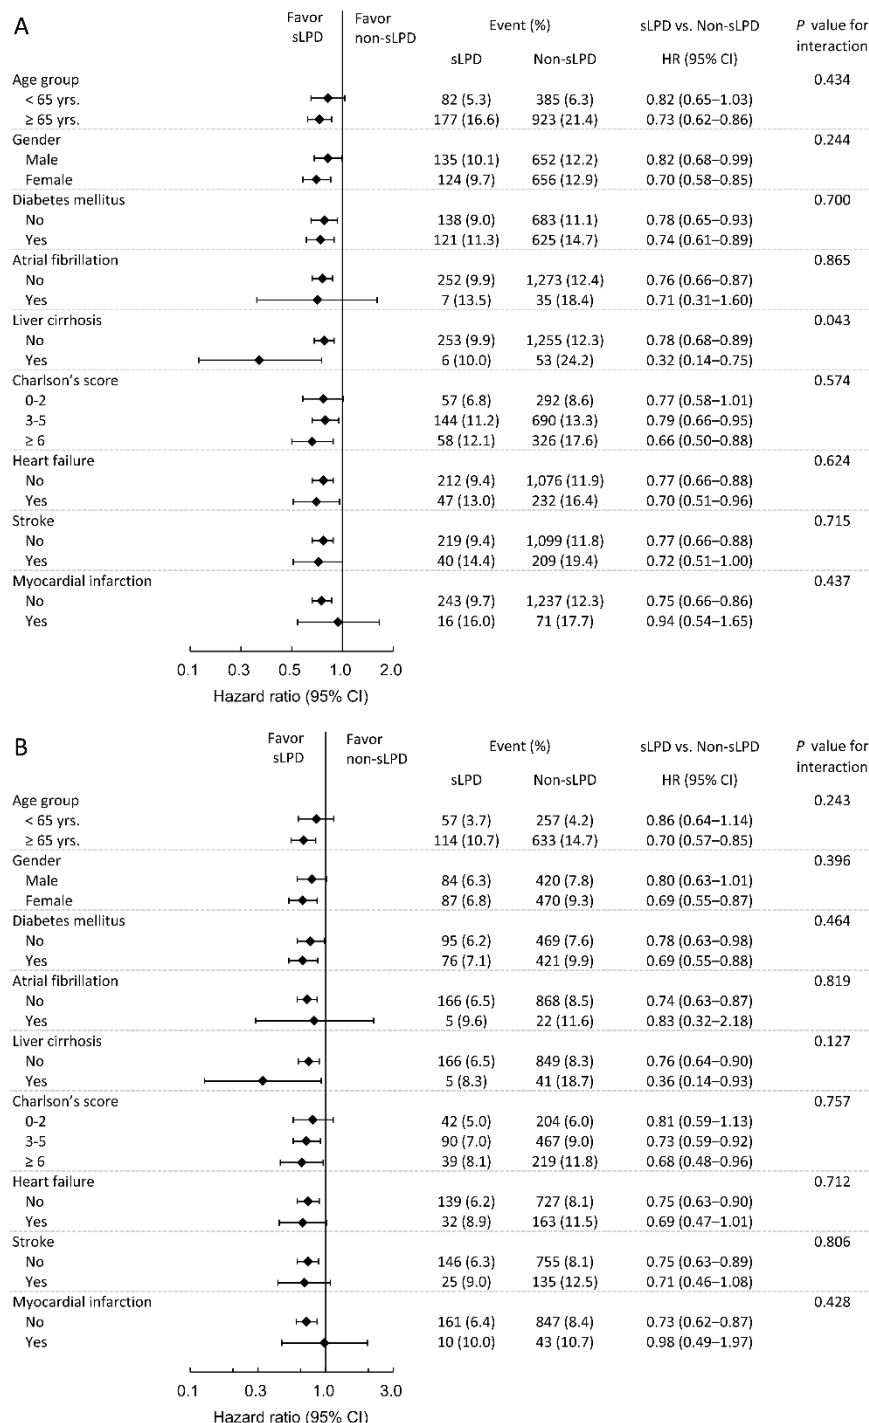

**Figure S1.** Prepecified subgroup analysis of infection-related death (A) and sepsis-related death (B).
